# Supplementary material for: Scoping review of costs of implementation strategies in community, public health and healthcare settings
Source: HighWire-hosted journal article supplement (doi:10.1136/bmjopen-2022-060785), 2022-06-01
Supplement: bmjopen-2022-060785supp004_data_supplement.pdf [file bmjopen-2022-060785supp004_data_supplement.pdf]

**Supplementary Table S4.** Characteristics of D&I strategies and cost information.

| Study                    | EBP                                 | Action target           | Individual vs. organizational (action target) | No. of action target                       | Implementation outcomes | Mapped discrete D&I strategies (costs, if any)                                                                                                                                                                                                 | Total costs                                                             | Mean costs per action target              | Mean costs per EBP participant             |
|--------------------------|-------------------------------------|-------------------------|-----------------------------------------------|--------------------------------------------|-------------------------|------------------------------------------------------------------------------------------------------------------------------------------------------------------------------------------------------------------------------------------------|-------------------------------------------------------------------------|-------------------------------------------|--------------------------------------------|
| Afshar, 2019 [51]        | CMS sepsis management bundles       | Clinician               | Individual                                    | N/A                                        | Adoption                | -Audit and provide feedback (\$891,970)<br>-Conduct ongoing training (\$3,897)<br>-Develop educational materials (\$759)<br>-Develop and organize quality monitoring systems (\$243,418)<br>-Purposely reexamine the implementation (\$64,992) | \$1,205,037                                                             | N/A                                       | \$155                                      |
| Becker, 2012 [75]        | LBP management guideline            | Physician & nurse       | Individual                                    | 126 for physician (GI) & 72 for nurse (MC) | Adoption                | -Conduct ongoing training                                                                                                                                                                                                                      | \$52,758 (GI only);<br>\$72,054 (GI + MC)                               | N/A                                       | \$110 (GI only); \$147 (GI+MC)             |
| Broughton, 2013* [65]    | Kangaroo mother care                | Clinician               | Individual                                    | 3                                          | Adoption                | -Conduct educational meetings<br>-Conduct ongoing training<br>-Development educational materials (\$2,431)<br>-Use train-the-trainer strategies (\$19,661)<br>-Distribute educational materials (\$5,153)                                      | \$22,092                                                                | \$7,364                                   | \$425                                      |
| Broughton, 2018 [36]     | Voluntary medical male circumcision | Health workers          | Individual                                    | N/A                                        | Compliance              | -Conduct educational outreach visit (\$51,740)<br>-Facilitation (\$58,440)                                                                                                                                                                     | \$5,153 (M);<br>\$51,740 (MH);<br>\$58,440 (MHC)                        | N/A                                       | \$1.2 (M);<br>\$21.4 (MH);<br>\$29.7 (MHC) |
| Calo, 2018 [88]          | HPV vaccination                     | Providers               | Individual                                    | 9 (in-person); 5 (webinar)/session         | Reach/acceptability     | -Facilitation                                                                                                                                                                                                                                  | \$755/session (in person delivery);<br>\$475/session (webinar delivery) | \$84 (in person); \$95 (webinar)/provider | N/A                                        |
| Chandrashakar, 2019 [40] | Maternal & newborn health behavior  | Self-help groups (SHGs) | Individual                                    | 17,120                                     | Adoption                | -Intervene with patients/consumer to enhance uptake & adherence                                                                                                                                                                                | \$4,399,840                                                             | \$257/SHG                                 | \$16                                       |
| Chang, 2016 [55]         | HIV testing                         | Community               |                                               | 12                                         | Reach                   | -Conduct educational meetings (\$658,428)<br>-Identify and prepare champion (\$274,200)                                                                                                                                                        | \$932,627                                                               | \$77,719                                  | \$207                                      |

|                    |                                                                             |                                       |                |                   |             |                                                                                                     |                                                    |                                |                                                                          |
|--------------------|-----------------------------------------------------------------------------|---------------------------------------|----------------|-------------------|-------------|-----------------------------------------------------------------------------------------------------|----------------------------------------------------|--------------------------------|--------------------------------------------------------------------------|
| Chung, 2018 [37]   | Depression collaborative care                                               | Clinic & community                    | Organizational | 45 (RS); 48 (CEP) | Adoption    | -Build a coalition (\$326,123)<br>-Facilitation (\$117,887)                                         | \$117,889 (RS);<br>\$326,123 (CEP)                 | \$2,620 (RS);<br>\$6,794 (CEP) | \$235 (RS);<br>637 (CEP)                                                 |
| Claes, 2010 [76]   | CVD guideline                                                               | General practice & staff              | Individual     | 102               | Adoption    | -Conduct ongoing training (\$12,067)<br>-Inform local opinion leader (\$1,455)                      | \$125,792                                          | \$1,233                        | N/A                                                                      |
| Dalaba, 2014 [77]  | WHO PCPNC guideline                                                         | Nurse, midwife, & medical assistant   | Individual     | 22                | Fidelity    | -Conduct ongoing training                                                                           | \$3,194                                            | \$1,195/CDSS user trained      | \$0.5                                                                    |
| Dik, 2015 [90]     | Antibiotic Stewardship Team                                                 | A-team (physical, fellow, & resident) | Individual     | 1                 | Feasibility | -Audit and provide feedback                                                                         | \$26,093                                           | \$26,093/A-Team                | \$229                                                                    |
| Dirks, 2012 [93]   | Thrombolysis                                                                | Hospital                              | Organizational | 6                 | Adoption    | -Organize clinician implementation team meetings                                                    | \$85,422                                           | \$14,237                       | \$97                                                                     |
| Dopp, 2017 [41]    | TF-CBT                                                                      | Therapists & clinical supervisors     | Individual     | 574               | Competence  | -Create a learning collaborative                                                                    | \$555,588                                          | \$12,583                       | \$5,115                                                                  |
| Doran, 2016 [50]   | skin cancer prevention strategy                                             | Adolescents & young adults            | Individual     | N/A               | Reach       | -Conduct education meetings                                                                         | \$1.1-\$2.9 million/year                           | N/A                            | \$0.16-\$0.40                                                            |
| Edwards, 2016 [49] | Incredible Years BASIC parenting program                                    | Group leaders                         | Individual     | 60                | Adoption    | -Provide ongoing consultation (\$58,692)<br>-Recruit designate and train for leadership (\$113,188) | \$171,881                                          | \$2,865                        | \$1,563                                                                  |
| Emery, 2018 [92]   | Tailored text message smoking cessation                                     | N/A                                   | Organizational | N/A               | Adoption    | -Use mass media                                                                                     | \$1,623/1 month (Google);<br>\$1,507/3 months (FB) | N/A                            | \$40 (Google);<br>\$36 (FB)/ per initiation of smoking cessation program |
| Engel, 2014 [86]   | Treatment guideline of appropriate timing of the switch to oral antibiotics | Physician                             | Individual     | 42                | Fidelity    | -Conduct local consensus discussion (\$937)<br>-Conduct education meetings (\$7,752)                | \$8,689                                            | \$207                          | \$39                                                                     |

|                         |                                                               |                                   |                |                              |                         |                                                                                                                                          |                                                                                                                                                    |                                    |                                                                                 |
|-------------------------|---------------------------------------------------------------|-----------------------------------|----------------|------------------------------|-------------------------|------------------------------------------------------------------------------------------------------------------------------------------|----------------------------------------------------------------------------------------------------------------------------------------------------|------------------------------------|---------------------------------------------------------------------------------|
| Fortney, 2014 [56]      | Telemedicine-based collaborative care                         | community-based outpatient clinic | Organizational | 11                           | Adoption                | -Facilitation<br>-Purposely reexamine the implementation                                                                                 | \$101,403                                                                                                                                          | \$9,218                            | \$90                                                                            |
| Freedman, 2017 [48]     | Portable handwashing water stations & drinking water stations | Healthcare facility               | Organizational | 117                          | Adoption                | -Use train-the-trainer strategies                                                                                                        | \$17,844                                                                                                                                           | \$440                              | \$0.02                                                                          |
| Galactionova, 2015 [28] | Malaria vaccine (RTS,S/AS01)                                  | Immunization staff                | Individual     | N/A                          | Adoption                | -Develop educational materials<br>-Conduct ongoing training<br>-Use social media<br>-Chance record system<br>-Conduct education meetings | \$969,322 (Burkina Faso),<br>\$1,744,263 (Ghana),<br>\$466,714 (Senegal),<br>\$2,972,346 (Kenya),<br>\$1,044,440 (Tanzania),<br>\$478,088 (Uganda) | N/A                                | \$14 (Burkina Faso); \$2 (Ghana); \$1 (Senegal); \$1 (Tanzania); \$0.3 (Uganda) |
| Galaviz, 2017* [29]     | PA counseling                                                 | Physician                         | Individual     | 305                          | Adoption/implementation | -Identify and prepare champions<br>-Conduct ongoing training (\$273)                                                                     | \$273 (\$21/session)                                                                                                                               | \$1                                | N/A                                                                             |
| Garner, 2018 [34]       | A-CRA                                                         | Community organization            | Organizational | 14 (IAU); 15 (IAU+P4P)       | Competence              | -Conduct education meetings (\$22,366 (IAU); \$2,7873 (IAU+P4P))<br>-Use other payment scheme (\$3,484)                                  | \$22,366 (IAU); \$31,356 (IAU+P4P)                                                                                                                 | \$1,598 (IAU); \$2,090 (IAU+P4P)   | \$35 (IAU); \$58 (IAU+P4P)                                                      |
| Gilkey, 2014 [42]       | Adolescent immunization                                       | Primary care clinic               | Organizational | 30 (in-person); 31 (webinar) | Reach                   | -Facilitation                                                                                                                            | \$5,000 (in-person delivery); \$3,387 (webinar delivery)                                                                                           | \$167 (in-person); \$109 (webinar) | N/A                                                                             |
| Green, 2017 [53]        | Colorectal cancer screening                                   | Primary care clinic               | Organizational | 1                            | Reach                   | -Distribute educational materials                                                                                                        | \$11,339                                                                                                                                           | \$11,339                           | \$5                                                                             |

|                      |                                                                                       |                                                                    |                |                                     |                                      |                                                                                                                                                                                                         |                                                            |                                          |                                               |
|----------------------|---------------------------------------------------------------------------------------|--------------------------------------------------------------------|----------------|-------------------------------------|--------------------------------------|---------------------------------------------------------------------------------------------------------------------------------------------------------------------------------------------------------|------------------------------------------------------------|------------------------------------------|-----------------------------------------------|
| Griffiths, 2016 [69] | Pneumococcal, rotavirus, & measles vaccine                                            | Immunization staff                                                 | Individual     | 26                                  | Reach                                | -Conduct education meetings (\$44,165(MSD), \$176,659(PCV), \$422,894(RV))<br>-Mandate change (\$66,647(MSD), \$266,587PCV), \$412,362(RV))                                                             | \$672,679 (MSD);<br>\$1,415,931 (PCV);<br>\$2,515,046 (RV) | N/A                                      | \$1.05 (MSD);<br>\$2.21 (PCV);<br>\$3.91 (RV) |
| Hansen, 2017 [32]    | ACTs                                                                                  | Drug shop vendors                                                  | Individual     | 29 (intervention); 30 (control)     | Fidelity                             | -Conduct education meetings (\$1,004 (intervention), \$987 (control))<br>-Conduct ongoing training (\$4,055 (control), \$4950(intervention))<br>-Facilitation (\$2950 (control), \$3733 (intervention)) | \$10,022 (intervention);<br>\$8,257 (control)              | \$346 (intervention);<br>\$275 (control) | \$4 (intervention);<br>\$3 (control)          |
| Hiscock, 2019 [39]   | Sleep behavioral intervention                                                         | Pediatrician & psychologist                                        | Individual     | 32 pediatricians & 27 psychologists | Adoption                             | -Conduct ongoing training                                                                                                                                                                               | \$212                                                      | \$4                                      | \$1                                           |
| Hoelt, 2019 [54]     | Collaborative care                                                                    | Site (primary care clinic & their community partner organizations) | Organizational | 7 sites                             | Adoption                             | -Conduct ongoing training (\$63,534)<br>-Develop a formal implementation blueprint (\$41,499)                                                                                                           | N/A                                                        | \$39,764-\$61,321                        | N/A                                           |
| Howson, 2018 [78]    | Mealtime assistance                                                                   | Trained volunteer                                                  | Individual     | 65                                  | Reach & fidelity                     | -Conduct ongoing training                                                                                                                                                                               | \$8,449                                                    | \$130                                    | \$10                                          |
| Ibrahim, 2018 [44]   | Grip strength measurement protocol                                                    | Nurse                                                              | Individual     | 155                                 | Acceptability, feasibility, fidelity | -Conduct ongoing training<br>-Develop educational materials<br>-Use advisory boards and workgroups<br>-Audit and provide feedback                                                                       | Range: \$3,342-\$3,469                                     | \$22                                     | N/A                                           |
| James, 2017 [79]     | Tuberculosis active case finding Clinical practice guideline on the management of LBP | Community health worker                                            | Individual     | NA                                  | Reach                                | -Conduct ongoing training                                                                                                                                                                               | \$65,196 (Cenat);<br>\$21,386 (Hope);<br>\$12,144 (Cata)   | N/A                                      | \$81 (Cenat);<br>\$29 (Hope);<br>\$31(Cata)   |
| Jensen, 2017 [89]    | Tuberculosis active case finding Clinical practice guideline on the management of LBP | General practice                                                   | Organizational | 28                                  | Adoption                             | -Develop and organize quality monitoring systems (\$9,741)<br>-Facilitation (\$20,574)<br>-Use train-the-trainer strategies (\$20,070)                                                                  | \$50,383                                                   | \$1,799                                  | \$93                                          |

|                       |                                                                                   |                             |                |                                                                                     |                   |                                                                                                                                                                                                                                                                                                                                                                                        |                                                                                                            |                                                                                               |                                                                                                           |
|-----------------------|-----------------------------------------------------------------------------------|-----------------------------|----------------|-------------------------------------------------------------------------------------|-------------------|----------------------------------------------------------------------------------------------------------------------------------------------------------------------------------------------------------------------------------------------------------------------------------------------------------------------------------------------------------------------------------------|------------------------------------------------------------------------------------------------------------|-----------------------------------------------------------------------------------------------|-----------------------------------------------------------------------------------------------------------|
| Jordan, 2019 [80]     | Family Check-up 4 Health                                                          | Primary care clinic         | Organizational | 3                                                                                   | Adoption          | -Conduct ongoing training (\$42,086)<br>-Develop a formal implementation blueprint (\$16,270)                                                                                                                                                                                                                                                                                          | \$196,006                                                                                                  | \$65,335                                                                                      | N/A                                                                                                       |
| Krukowski, 2013 [27]  | LHE-delivered DPP                                                                 | Lay health educator         | Individual     | 20                                                                                  | Adoption          | -Conduct ongoing training (\$6,031)<br>-Develop educational materials (1,295)                                                                                                                                                                                                                                                                                                          | \$7,288                                                                                                    | \$364                                                                                         | \$63                                                                                                      |
| Kyabayinze, 2012 [81] | Malaria rapid diagnostic tests                                                    | Health worker               | Individual     | 135                                                                                 | Adoption          | -Conduct ongoing training                                                                                                                                                                                                                                                                                                                                                              | \$17,089                                                                                                   | \$114                                                                                         | N/A                                                                                                       |
| Lara, 2018 [57]       | Colorectal cancer screening                                                       | Primary care clinic         | Organizational | Health system 1 ( 9 clinics),<br>Health system 2 ( 4 clinics)                       | Reach/penetration | -Audit and provide feedback<br>-Remind clinicians<br>-Intervene with patients/consumers to enhance uptake and adherence                                                                                                                                                                                                                                                                | N/A                                                                                                        | \$62,072 (health system 1);<br>\$28,341 (health systems 2)                                    | \$25 (health system 1);<br>\$30 (health system 2)                                                         |
| Liu, 2009* [82]       | QI for depression care                                                            | Multistate regional network | Organizational | 86 (clinical team); 42 (technical team)                                             | Fidelity          | -Conduct ongoing training (\$33,494 (clinical team), \$33,640 (technical team))<br>-Develop educational materials<br>-Provide local technical assistance (\$2,056 (clinical team), \$12,953 (technical team))<br>-Remind clinicians (\$8,794 (clinical team), \$105,457 (technical team))<br>-Use advisory boards and workgroups (\$60,923 (clinical team), \$62,873 (technical team)) | \$118,770 (clinical team); \$278,204 (technical expert team)                                               | \$1,381 (clinical team);<br>\$6,624 (technical expert team)                                   | N/A                                                                                                       |
| Moessner, 2016 [35]   | Internet-based program for the prevention and early intervention in ED (ProYouth) | Secondary high school       | Organizational | 80 (strategy 1); 71 (strategy 2); 68 (strategy 3); 74 (strategy 4); 72 (strategy 5) | Reach             | -Conduct educational meeting (3,931)<br>-Distribute educational materials (\$6,096)<br>-Inform local opinion leaders (\$1,004)<br>-Identify and prepare champions (\$782)<br>-Use mass media (\$1,274)                                                                                                                                                                                 | \$1,274 (strategy 1); \$1,004 (strategy 2); \$782 (strategy 3); \$6,096 (strategy 4); \$3,931 (strategy 5) | \$16 (strategy 1); \$14 (strategy 2); \$12 (strategy 3); \$82 (strategy 4); \$55 (strategy 5) | \$61 (strategy 1);<br>\$59 (strategy 2);<br>\$112 (strategy 3);<br>\$41 (strategy 4);<br>\$5 (strategy 5) |

|                      |                                                            |                                         |                |                                                         |                       |                                                                                                                                                                                                                                          |                                                                    |                                                                 |       |
|----------------------|------------------------------------------------------------|-----------------------------------------|----------------|---------------------------------------------------------|-----------------------|------------------------------------------------------------------------------------------------------------------------------------------------------------------------------------------------------------------------------------------|--------------------------------------------------------------------|-----------------------------------------------------------------|-------|
| Mortimer, 2018* [30] | Evidence-based guidelines                                  | Emergency department                    | Organizational | 10                                                      | Adoption              | -Distribute educational materials<br>-Provide local technical assistance (\$8,195)<br>-Inform local opinion leaders(\$1,663)<br>-Organize clinician implementation team meetings (\$6,326)<br>-Use train-the-trainer strategy (\$51,894) | \$91,952                                                           | \$9,195                                                         | \$730 |
| Mortimer, 2013 [33]  | Clinical practice guidelines for acute LBP                 | General practitioner                    | Individual     | 59 (active implementation); 53 (standard dissemination) | Fidelity              | -Conduct ongoing training (\$13,799)<br>-Distribute educational materials (\$1,884)<br>-Make training dynamic (\$7,481)<br>-Provide local technical assistance (\$11,296)                                                                | \$27,270 (active implementation); \$4,955 (standard dissemination) | \$462 (active implementation); \$93 (guideline dissemination)   | N/A   |
| Njau, 2008 [83]      | Malaria treatment (ACT)                                    | Public health & mission health facility | Organizational | 56                                                      | Reach                 | -Conduct ongoing training (\$30,774)<br>-Change record systems (\$111,661)<br>-Use mass media (\$59,404)                                                                                                                                 | \$201,838                                                          | \$3,604                                                         | N/A   |
| Perraudin, 2019 [84] | Inter-professional medication adherence program            | Pharmacy technician                     | Individual     | N/A                                                     | Adoption              | -Conduct ongoing training (\$2,830)<br>-Develop educational materials (\$1,310)<br>-Develop a formal implementation blueprint (\$2,774)                                                                                                  | \$7,408                                                            | N/A                                                             | N/A   |
| Quanbeck, 2018 [91]  | Clinical guidelines for opioid prescribing in primary care | Primary care clinic                     | Organizational | 4                                                       | Adherence             | -Audit and provide feedback (\$30,280)<br>-Conduct educational outreach visits<br>-Facilitation                                                                                                                                          | \$30,280                                                           | \$7,570                                                         | \$4   |
| Quinn, 2016 [45]     | ENGAGE-HD PA intervention                                  | Health coaches                          | Individual     | 7                                                       | Fidelity              | -Conduct ongoing training (\$50,727)<br>-Provide ongoing consultation (\$31,025)<br>-Audit and provide feedback (\$3,100(high), \$1,417(medium), \$3,189(low))                                                                           | \$81,752                                                           | \$11,679                                                        | N/A   |
| Reilly, 2018 [47]    | Australian healthy canteen policies                        | School                                  | Organizational | 35 (high); 28 (medium); 36 (low)                        | Adherence /compliance | -Conduct ongoing training (\$105,772(high);, \$45,590(medium), \$49,803(low))<br>-Facilitation (\$64,464(high), \$583(medium))<br>-Conduct local consensus discussions (\$209 (high))                                                    | N/A                                                                | \$116,911 (High), \$49,662 (Medium), \$52,992 (Low)/ per school | N/A   |

|                      |                                         |                                          |                |                                                                                      |                                |                                                                                                                                                                                                                                            |                                                                      |                                                                    |                                                                  |
|----------------------|-----------------------------------------|------------------------------------------|----------------|--------------------------------------------------------------------------------------|--------------------------------|--------------------------------------------------------------------------------------------------------------------------------------------------------------------------------------------------------------------------------------------|----------------------------------------------------------------------|--------------------------------------------------------------------|------------------------------------------------------------------|
| Ritchie, 2019 [43]   | Primary care mental health integration  | Primary care clinic                      | Organizational | 4 (network A); 4 (network C)                                                         | Reach, adoption, adherence     | -Facilitation                                                                                                                                                                                                                              | \$266,736 (network A), \$261,307 (network C)                         | \$66,684 (network A), \$65,327 (network C)                         | N/A                                                              |
| Romney, 2014 [38]    | Positive Parenting Program (Triple P)   | Staff & supervisor                       | Individual     | 13 staff, 4 sites (with readiness process); 6 staff, 2 sites (w/o readiness process) | Acceptability                  | -Conduct ongoing training<br>-Assess for readiness and identify barriers and facilitators<br>-Facilitation                                                                                                                                 | \$36,817 (w/ readiness process)/<br>\$17,078 (w/o readiness process) | \$2,832 (w/ readiness process);<br>\$2,846 (w/o readiness process) | \$751 (w/ readiness process);<br>\$1,139 (w/o readiness process) |
| Sadasivam, 2013 [58] | Decide2Quit                             | Medical practice/dental practice         | Organizational | 87 (medical practice); 50 dental practice)                                           | Feasibility                    | -Conduct ongoing training<br>-Distribute educational materials                                                                                                                                                                             | \$40,985 (medical practice);<br>\$13,262 (dental practice)           | \$477 (medical practice);<br>\$265 (dental practice)               | \$97 (medical practice);<br>\$74 (dental practice)               |
| Sari, 2017 [85]      | Healthy Start-Départ Santé intervention | Early learning center educators          | Individual     | N/A                                                                                  | Appropriateness/sustainability | -Conduct ongoing training (\$\$330-\$1864/session)<br>-Distribute educational materials (\$9,991(year 1), \$8,793 (year 2), \$6,580 (year 3))<br>-Provide ongoing consultation (\$334,252(year 1), \$332,201 (year 2), \$278,558 (year 3)) | \$413,576 (year 1); \$389,668 (year 2);<br>\$340,879 (year 3)        | N/A                                                                | \$311                                                            |
| Shelley, 2015 [46]   | Syphilis POC screening test             | Health center/hospital                   | Organizational | 5 (pilot); 4 (rollout)                                                               | Reach                          | -Conduct educational meetings (\$35/facility (pilot))<br>-Use train-the-trainer strategies (\$100/facility (pilot), \$184/facility (rollout))                                                                                              | N/A                                                                  | \$135/facility (pilot);<br>\$184/facility (rollout)                | N/A                                                              |
| Soi, 2019 [87]       | HPV vaccination                         | Staff from health facilities & districts | Individual     | 45                                                                                   | Reach                          | -Conduct educational meetings (\$67,801 (year 1), \$30,134 (year 2))<br>-Provide clinical supervision (\$60,441 (year1), \$38,120 (year 2))                                                                                                | \$132,664 (year 1); \$70,219 (year 2)                                | \$2,948 (year 1); \$1,560 (year 2)                                 | \$78 (year 1);<br>\$41 (year 2)/fully immunized girl             |
| Stults, 2016 [52]    | SMAAs                                   | Physicians/staff                         | Individual     | 9                                                                                    | Adoption                       | -Conduct ongoing training (\$375)<br>-Conduct education meetings (\$47,387)<br>-Develop education materials (\$3,875)<br>-Provide local technical assistance (\$625)                                                                       | \$52,262                                                             | \$5,807                                                            | N/A                                                              |

\*Studies did not include costs for some identified implementation strategies or costs were not separable.

All the costs were reported in 2020 US dollars.

D&I, dissemination and implementation; EBP, evidence-based program; LBP, low back pain; POC, point-of-care; QI, quality improvement; PA, physical activity; DPP, diabetes prevention program; QI, quality improvement; ED, eating disorders; SMAs, shared medical appointments; ACTs, artemisinin- based combination therapies; CDSS, clinical decision support system; PCPNC, Pregnancy, Childbirth, Postpartum and Newborn Care; A-CRA, adolescent community reinforcement approach; IAU, implementation-as-usual; P4P, pay-for-performance; MSD, measles; PCV, pneumococcal conjugate vaccine; RV, rotavirus vaccine; GI, guideline implementation; MC, motivational counseling; TF-CBT, trauma-focused cognitive behavioral therapy; RS, resources for services; CEP, community engagement and planning; HPV, human papillomavirus; M, manual; MH, manual and handover meeting; MHC, manual, handover meeting and coaching visits.
